# Supplementary material for: Oral health-related quality of life in children and adolescents with osteogenesis imperfecta: cross-sectional study
Source: Springer Nature journal article supplement (doi:10.1186/s13023-018-0935-y), 2018-10-25
Supplement: MOESM1 [file 16226322]

ORAL HEALTH RELATED QUALITY OF LIFE QUESTIONNAIRE  
8-10 years

We are doing this study to understand better things that may happen to children because of their teeth and mouth.

PLEASE REMEMBER:

- Don't write your name on the questionnaire.
- This is not a test and there are no right or wrong answers.
- Answer as honestly as you can.
- Don't talk to anyone about the questions when you are answering them.
- No one you know will see your answers.
- Read each question carefully and think about the things that have happened to you in the past 4 weeks .
- Before you answer, ask yourself : "Does this happen to me because of my teeth or mouth?"
- Put an x in the box for the answer that is best for you.

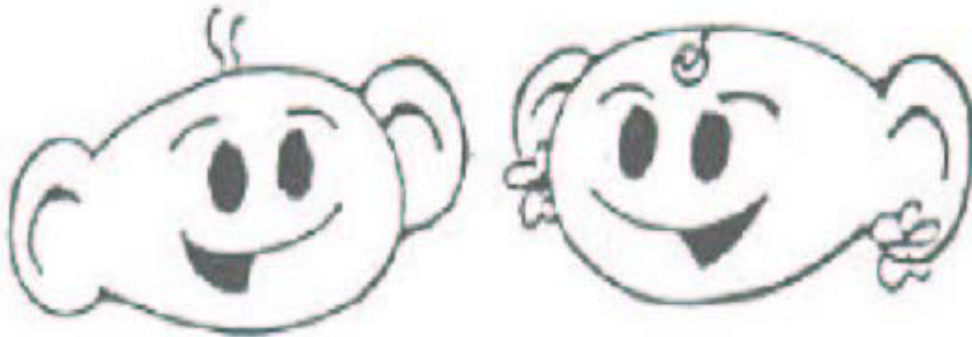

Today's date: \_\_\_\_\_ / \_\_\_\_\_ / \_\_\_\_\_  
DAY MONTH YEAR

**FIRST, A FEW QUESTIONS ABOUT YOU**

**1. When you think about your teeth or mouth, would you say that they are:**

- Very good
- Good
- O.K
- Poor

**2. How much do your teeth or mouth bother you in your everyday life?**

- Not at all
- A little bit
- Some
- A lot

**NOW A FEW QUESTIONS ABOUT YOUR TEETH AND MOUTH**

**How often have you had:**

**3. Pain in your teeth or mouth in the past four weeks?**

- Never
- Once or twice
- Sometimes
- Often
- Everyday or almost everyday

**4. Sore spots in your mouth in the past four weeks?**

- Never
- Once or twice
- Sometimes
- Often
- Everyday or almost everyday

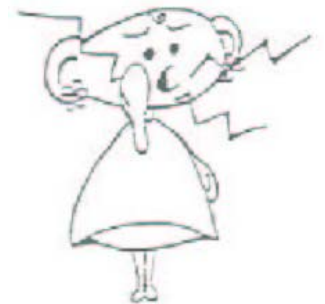

**5. Pain in your teeth when you drink cold drinks or eat hot foods in the past 4 weeks?**

- Never
- Once or twice
- Sometimes
- Often
- Everyday or almost everyday

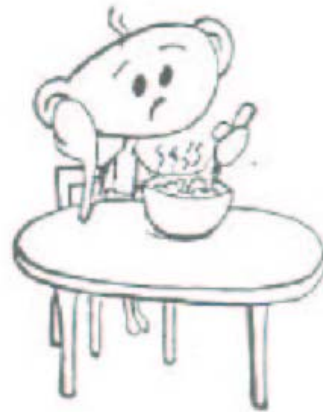

**6. Food stuck in your teeth in the past four weeks?**

- Never
- Once or twice
- Sometimes
- Often
- Everyday or almost everyday

**7. Bad breath in the past four weeks?**

- Never
- Once or twice
- Sometimes
- Often
- Everyday or almost everyday

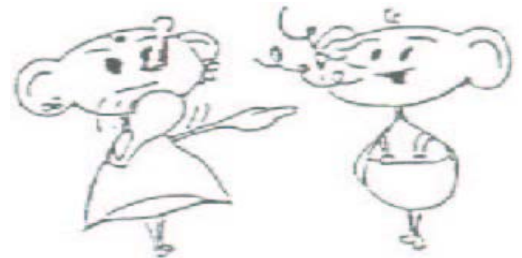

How often have you:

**8. Needed longer time than others to eat your meal because of your teeth or mouth in the past 4 weeks?**

- Never
- Once or twice
- Sometimes
- Often
- Everyday or almost everyday

**9. Had a hard time biting or chewing food like apples, corn on the cob or steak because of your teeth or mouth in the past 4 weeks?**

- Never
- Once or twice
- Sometimes
- Often
- Everyday or almost everyday

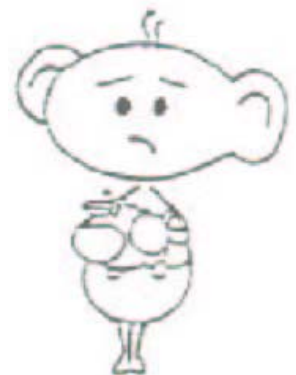

**10. Had trouble eating foods you would like to eat because of your teeth or mouth in the past 4 weeks?**

- Never
- Once or twice
- Sometimes
- Often
- Everyday or almost everyday

**11. Had trouble saying some words because of your teeth or mouth in the past 4 weeks?**

- Never
- Once or twice
- Sometimes
- Often
- Everyday or almost everyday

**12. Had a problem sleeping at night because of your teeth or mouth in the past 4 weeks?**

- Never
- Once or twice
- Sometimes
- Often
- Everyday or almost everyday

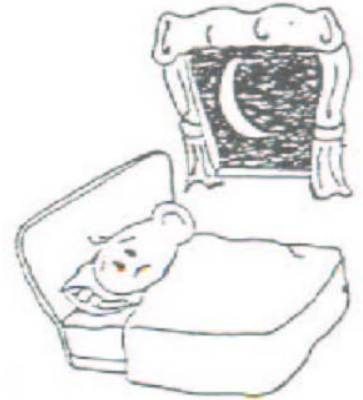

**QUESTIONS ABOUT FEELINGS**

**How often have you:**

**13. Been upset because of your teeth or mouth in the past 4 weeks?**

- Never
- Once or twice
- Sometimes
- Often
- Everyday or almost everyday

**14. Felt frustrated because of your teeth or mouth in the past 4 weeks?**

- Never
- Once or twice
- Sometimes
- Often
- Everyday or almost everyday

**15. Been shy because of your teeth or mouth in the past four weeks?**

- Never
- Once or twice
- Sometimes
- Often
- Everyday or almost everyday

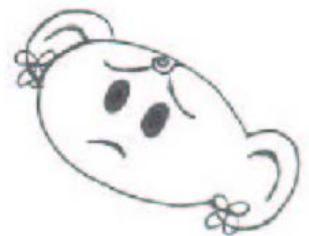

**16. Been concerned what other people think about your teeth or mouth in the past four weeks?**

- Never
- Once or twice
- Sometimes
- Often
- Everyday or almost everyday

**17. Worried that you are not as good-looking as others because of your teeth or mouth in the past four weeks?**

- Never
- Once or twice
- Sometimes
- Often
- Everyday or almost everyday

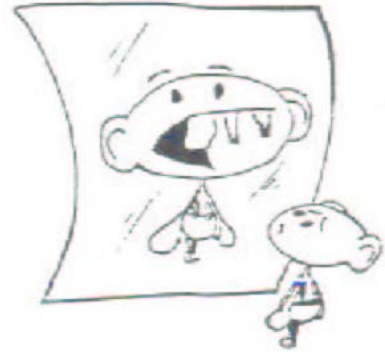

**QUESTIONS ABOUT YOUR SCHOOL**

**How often have you:**

**18. Missed school because of your teeth or mouth in the past four weeks?**

- Never
- Once or twice
- Sometimes
- Often
- Everyday or almost everyday

**19. Had a hard time doing your homework because of your teeth or mouth in the past four weeks?**

- Never
- Once or twice
- Sometimes
- Often
- Everyday or almost everyday

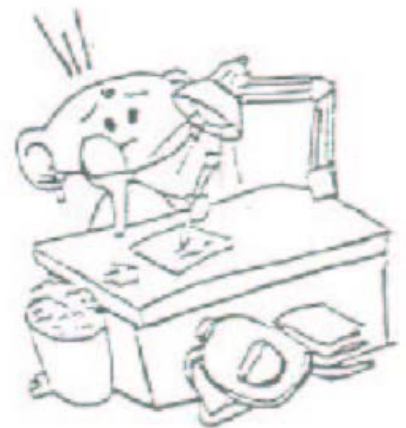

**20. Had a hard time paying attention in school because of your teeth or mouth in the past 4 weeks?**

- Never
- Once or twice
- Sometimes
- Often
- Everyday or almost everyday

**21. Not wanted to speak or read out loud in class because of your teeth or mouth in the past 4 weeks?**

- Never
- Once or twice
- Sometimes
- Often
- Everyday or almost everyday

**QUESTIONS ABOUT YOU BEING WITH OTHER PEOPLE**

**How often have you:**

**22. Stayed away from activities like sports and clubs because of your teeth or mouth in the past four weeks?**

- Never
- Once or twice
- Sometimes
- Often
- Everyday or almost everyday

**23. Not wanted to talk to other children because of your teeth or mouth in the past four weeks?**

- Never
- Once or twice
- Sometimes
- Often
- Everyday or almost everyday

**24. Tried not to smile or laugh when with other children because of your teeth or mouth in the past four weeks?**

- Never
- Once or twice
- Sometimes
- Often
- Everyday or almost everyday

**25. Not wanted to be with other children because of your teeth or mouth in the past four weeks?**

- Never
- Once or twice
- Sometimes
- Often
- Everyday or almost everyday

How often have:

**26. Other children teased you or called you names because of your teeth or mouth in the past 4 weeks?**

- Never
- Once or twice
- Sometimes
- Often
- Everyday or almost everyday

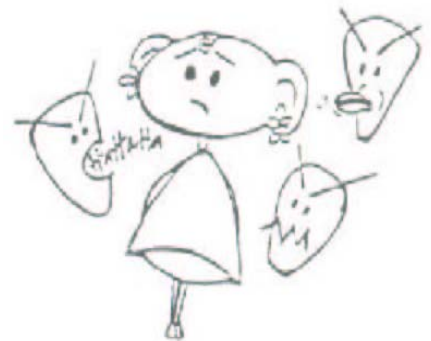

**27. Other children asked you questions about your teeth or mouth in the past four weeks?**

- Never
- Once or twice
- Sometimes
- Often
- Everyday or almost everyday

**THERE, IT'S FINISHED!**

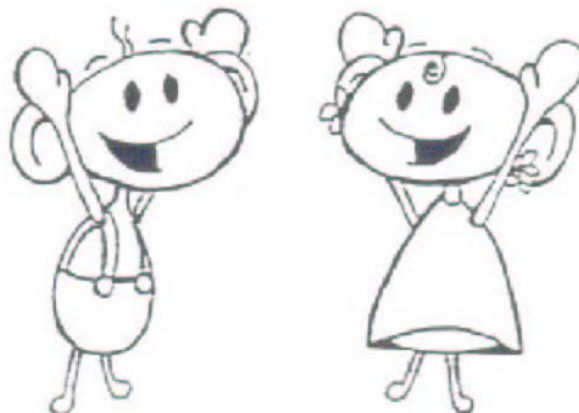

**THANK YOU FOR HELPING US**
